# Supplementary material
Source: publisher figshare collection journal article supplement (https://acs.figshare.com/ndownloader/files/15368810)
Supplement: Supplementary file 1 [file 15368810]

# Investigating the Role of Alkyl Chain Length of the Inhibitors on Its Intercalation Inhibiting Mechanism in Sodium Montmorillonite

Gang Xie\*, Danchao Huang, Mingyi Deng, Pingya Luo\*\*

State Key Laboratory of Oil & Gas Reservoir Geology and Exploitation, Southwest Petroleum

University, Chengdu, Sichuan 610500, China.

## Supporting Information

### Elemental analysis

Fig. S1 shows the results of the elemental analysis of Na-MMT-inhibitor complexes. Nitrogen is a characteristic element in the Na-MMT-inhibitor complexes. Each inhibitor molecule contains two nitrogen atoms. The nitrogen content of the inhibitor can be quantitatively determined by measuring the Na-MMT-inhibitor complexes, and verifying the results of the isothermal adsorption. Table 4 shows that the proportion of nitrogen was the maximum at a low concentration of the inhibitor (0.5%w/w). The proportion of nitrogen did not change when the concentration of the inhibitor was increased, indicating that the saturated adsorption content of the adsorbed inhibitor was less than 0.5 % (w/w). The proportionate order of nitrogen in the inhibitors are  $C8 < C7 < C6 < C5 < C4 < C3 < C2$ , indicating that as the alkyl chain length increases, the nitrogen proportion gradually decreases. The saturated adsorption capacity of the inhibitors of Na-MMT decreased with the increase in the alkyl chain length.

S1 The nitrogen proportion of inhibitor adsorbed on the Na-MMT at different concentrations

| Inhibitors | Concentration wt% | N (At%) |
|------------|-------------------|---------|
| C2         | 0.50              | 2.84    |
|            | 1.00              | 2.83    |
|            | 1.50              | 2.85    |
|            | 2.00              | 2.86    |
|            | 2.50              | 2.83    |
|            | 3.00              | 2.84    |
|            | 3.50              | 2.85    |
|            | 4.00              | 2.86    |
| C3         | 0.50              | 2.66    |
|            | 1.00              | 2.64    |
|            | 1.50              | 2.65    |
|            | 2.00              | 2.67    |
|            | 2.50              | 2.67    |
|            | 3.00              | 2.64    |
|            | 3.50              | 2.65    |
|            | 4.00              | 2.66    |
| C4         | 0.50              | 2.14    |
|            | 1.00              | 2.15    |
|            | 1.50              | 2.13    |
|            | 2.00              | 2.14    |
|            | 2.50              | 2.14    |
|            | 3.00              | 2.16    |
|            | 3.50              | 2.15    |
|            | 4.00              | 2.14    |
| C5         | 0.50              | 2.05    |
|            | 1.00              | 2.06    |
|            | 1.50              | 2.04    |
|            | 2.00              | 2.05    |
|            | 2.50              | 2.06    |
|            | 3.00              | 2.04    |
|            | 3.50              | 2.07    |
|            | 4.00              | 2.05    |
| C6         | 0.50              | 1.91    |
|            | 1.00              | 1.9     |
|            | 1.50              | 1.92    |
|            | 2.00              | 1.91    |
|            | 2.50              | 1.90    |
|            | 3.00              | 1.91    |
|            | 3.50              | 1.92    |
|            | 4.00              | 1.90    |

| Inhibitors | Concentration wt% | N (At%) |
|------------|-------------------|---------|
| C7         | 0.50              | 1.85    |
|            | 1.00              | 1.85    |
|            | 1.50              | 1.85    |
|            | 2.00              | 1.85    |
|            | 2.50              | 1.85    |
|            | 3.00              | 1.85    |
|            | 3.50              | 1.85    |
|            | 4.00              | 1.85    |
| C8         | 0.50              | 1.81    |
|            | 1.00              | 1.80    |
|            | 1.50              | 1.81    |
|            | 2.00              | 1.82    |
|            | 2.50              | 1.82    |
|            | 3.00              | 1.80    |
|            | 3.50              | 1.81    |
|            | 4.00              | 1.82    |
